# Supplementary material for: Optimization of a Method for the Simultaneous Extraction of Polar and Non-Polar Oxylipin Metabolites, DNA, RNA, Small RNA, and Protein from a Single Small Tissue Sample
Source: PubMed Central journal article supplement (PMC7564281; doi:10.3390/mps3030061), 2020-08-26
Supplement: mps-03-00061-s001.pdf [file mps-03-00061-s001.pdf]

## **Supplementary Information**

Optimization of a method for the simultaneous extraction of polar and non-polar oxylipin metabolites, DNA, RNA, small RNA, and protein from a single small tissue sample

Yu Hasegawa, Yurika Otoki, Shannon M<sup>c</sup>Clorry, Lauryne C. Coates, Rachel L. Lombardi, Ameer Y. Taha, Carolyn M. Slupsky

## Procedure for Methods A and B

For Methods A and B, the following steps were modified:

### 3.1. Preparation of Reagents

1. Prepare chloroform:methanol (2:1) with 0.002% BHT [*Solution 1*]. Pre-chill in a -20 °C freezer.
2. Prepare 1 mM EDTA dissolved in Type I water [*Solution 2*]. Pre-chill to 4 °C.
3. Prepare chloroform:methanol (10:1) [*Solution 3*]. Pre-chill in a -20 °C freezer.

### 3.3. Metabolite Extraction

#### 3.3.1. Method A

1. Add 1600 µL of chloroform, 800 µL of methanol, and 600 µL of Type I ultrapure water to tubes with ground brain tissue and mix by vortexing for 20 seconds.
2. Centrifuge the tubes for 15 min at 2,000 rpm at 0 °C to separate the sample into three layers.
3. Collect the upper layer into a new 15 mL conical centrifuge tube. Do not disturb the cell layer. Keep the tube on ice and proceed to step 22.
4. Using a 9-inch glass Pasteur pipette, collect the bottom layer and place in a new 8 mL glass tube. Place the tube on ice and proceed to step 31.
5. Proceed to step 42 to process the middle layer.

#### 3.3.2. Method B

1. Add 2.4 mL of cold *Solution 1* into the 8 mL glass tube with the cryoground tissue.
2. Add 600 µL of *Solution 2*.
3. Cap carefully and vortex for 20 s at max speed, and centrifuge for 15 min at 2,000 rpm at 0 °C.
4. Using a 9-inch glass Pasteur pipette, collect the bottom layer and place in a new 8 mL glass tube. Place the tube on ice.
5. Add 1.4 mL of cold *Solution 3* to the remaining upper and cell layer.
6. Vortex for 10 s at max speed, and centrifuge for 15 min at 2,000 rpm at 0 °C.
7. Collect the upper layer into a new 15 mL conical centrifuge tube. Do not disturb the cell layer. Keep the tube on ice and proceed to step 22.
8. Collect the bottom layer with a Pasteur pipette, and add to the glass tube from step 4. Place the tube on ice and proceed to step 31.
9. Proceed to step 42 to process the middle layer.

## Supplementary Tables

**Table S1.** Gradient conditions for oxylipin separation via LC-MS/MS analysis. Solvent B consisted of acetonitrile:methanol (80:15) containing 0.1% acetic acid.

| Time (min) | Solvent B concentration (%) | Flow (min/mL) |
|------------|-----------------------------|---------------|
| 0          | 35                          | 0.3           |
| 3          | 40                          | 0.25          |
| 4          | 48                          | 0.25          |
| 10         | 60                          | 0.25          |
| 20         | 70                          | 0.25          |
| 24         | 85                          | 0.25          |
| 24.5       | 85                          | 0.25          |
| 24.6       | 100                         | 0.35          |
| 26         | 100                         | 0.35          |
| 26.1       | 35                          | 0.35          |
| 27.3       | 35                          | 0.3           |
| 28         | Stop                        |               |

**Table S2.** Optimized mass-spectrometry parameters for measuring oxylipins.

| Compound name   | Precursor Ion (m/z) | Product Ion (m/z) | Frag (V) | CE (V) | Cell Acc (V) | Rt (min) | Internal standard |
|-----------------|---------------------|-------------------|----------|--------|--------------|----------|-------------------|
| 20-COOH-LTB4    | 365.2               | 347.2             | 120      | 7      | 4            | 4.0      | d4-LTB4           |
| Resolvin E1     | 349.3               | 195               | 115      | 10     | 4            | 4.6      | d4-PGE2           |
| d4-6-keto-PGF1a | 373.3               | 167.1             | 90       | 19     | 4            | 4.7      | -                 |
| 6-keto-PGF1a    | 369.3               | 163.2             | 90       | 22     | 4            | 4.7      | d4-6-keto-PGF1a   |
| 20-OH-LTB4      | 351.2               | 195.2             | 95       | 13     | 4            | 5.0      | d4-LTB4           |
| d4-TXB2         | 373.3               | 173.2             | 105      | 10     | 4            | 6.1      | -                 |
| TXB2            | 369.2               | 169.1             | 80       | 10     | 4            | 6.1      | d4-TXB2           |
| PGE3            | 349.3               | 269.2             | 120      | 7      | 4            | 6.2      | d4-PGE2           |
| PGD3            | 349.3               | 269.2             | 120      | 7      | 4            | 6.5      | d4-PGE2           |
| 9,12,13-TriHOME | 329.2               | 211.1             | 125      | 16     | 4            | 6.6      | d4-PGE2           |
| 9,10,13-TriHOME | 329.2               | 171.1             | 110      | 16     | 4            | 6.7      | d4-PGE2           |
| PGF2a           | 353.2               | 309.2             | 120      | 10     | 4            | 6.7      | d4-PGE2           |
| d4-PGE2         | 355.2               | 275.3             | 90       | 7      | 4            | 7.0      | -                 |
| PGE2            | 351.2               | 271.3             | 80       | 10     | 4            | 7.0      | d4-PGE2           |
| PGD1            | 353.3               | 317.2             | 75       | 7      | 4            | 7.2      | d4-PGE2           |
| PGE1            | 353.3               | 317.2             | 75       | 7      | 4            | 7.3      | d4-PGE2           |
| PGD2            | 351.2               | 271.3             | 80       | 10     | 4            | 7.3      | d4-PGE2           |
| LTD4            | 495.3               | 177.1             | 55       | 13     | 4            | 7.8      | d4-LTB4           |
| LXA4            | 351.2               | 115.2             | 95       | 10     | 4            | 8.1      | d4-LTB4           |
| LTC4            | 624.3               | 272.1             | 70       | 22     | 4            | 9.6      | d4-LTB4           |
| LTE4            | 438.2               | 333.3             | 90       | 13     | 4            | 9.7      | d4-LTB4           |
| PGJ2            | 333.3               | 189.2             | 90       | 10     | 4            | 9.9      | d4-PGE2           |
| PGB2            | 333.3               | 175.1             | 125      | 13     | 4            | 10.0     | d4-PGE2           |
| 6-trans-LTB4    | 335.2               | 195.1             | 125      | 7      | 4            | 10.8     | d4-LTB4           |
| 5,15-DiHETE     | 335.2               | 173.2             | 95       | 7      | 4            | 10.8     | d11-14,15-DiHETrE |
| 5,6-DiHETE      | 335.2               | 115.2             | 90       | 4      | 4            | 10.9     | d11-14,15-DiHETrE |
| 8,15-DiHETE     | 335.2               | 235.2             | 90       | 7      | 4            | 11.1     | d11-14,15-DiHETrE |
| 17,18-DiHETE    | 335.3               | 247.2             | 105      | 7      | 4            | 11.7     | d11-14,15-DiHETrE |
| d4-LTB4         | 339.2               | 197.2             | 80       | 10     | 4            | 11.9     | -                 |
| LTB4            | 335.2               | 195.1             | 125      | 7      | 4            | 11.9     | d4-LTB4           |

|                   |       |       |     |    |   |       |                   |
|-------------------|-------|-------|-----|----|---|-------|-------------------|
| 14,15-DiHETE      | 335.3 | 207.2 | 95  | 7  | 4 | 12.3  | d11-14,15-DiHETrE |
| 9,10-DiHOME       | 313.2 | 201.2 | 130 | 16 | 4 | 12.42 | d11-14,15-DiHETrE |
| 12,13-DiHOME      | 313.2 | 183.2 | 130 | 16 | 4 | 12.7  | d11-14,15-DiHETrE |
| 14,15-DiHETrE     | 337.2 | 207.1 | 130 | 10 | 4 | 13.8  | d11-14,15-DiHETrE |
| d11-14,15-DiHETrE | 348.2 | 207.1 | 125 | 10 | 6 | 13.8  | -                 |
| LTB3              | 337.2 | 195.2 | 120 | 7  | 4 | 14.2  | d4-LTB4           |
| 11,12-DiHETrE     | 337.2 | 167.1 | 120 | 13 | 4 | 14.8  | d11-14,15-DiHETrE |
| 9-HOTrE           | 293.2 | 171.2 | 110 | 4  | 4 | 15.3  | d4-9HODE          |
| 8,9-DiHETrE       | 337.2 | 127.1 | 85  | 13 | 4 | 15.6  | d11-14,15-DiHETrE |
| 13-HOTrE          | 293.2 | 195.1 | 125 | 10 | 4 | 15.6  | d4-9HODE          |
| 15-deoxy-PGJ2     | 315.2 | 271.2 | 130 | 4  | 4 | 16.1  | d4-PGE2           |
| d6-20-HETE        | 325.2 | 281.2 | 110 | 7  | 4 | 16.5  | -                 |
| 20-HETE           | 319.2 | 275.1 | 125 | 10 | 4 | 16.5  | d6-20-HETE        |
| 15-HEPE           | 317.2 | 219.2 | 90  | 4  | 4 | 16.6  | d8-5-HETE         |
| 5,6-DiHETrE       | 337.2 | 145.1 | 85  | 7  | 4 | 16.7  | d11-14,15-DiHETrE |
| 8-HEPE            | 317.2 | 155.2 | 115 | 7  | 4 | 17.0  | d8-5-HETE         |
| 12-HEPE           | 317.2 | 179.2 | 110 | 4  | 4 | 17.2  | d8-5-HETE         |
| 5-HEPE            | 317.2 | 115.1 | 115 | 4  | 4 | 17.8  | d8-5-HETE         |
| d4-9HODE          | 299.2 | 172.3 | 90  | 13 | 4 | 18.0  | -                 |
| 13-HODE           | 295.2 | 195.2 | 95  | 13 | 4 | 18.0  | d4-9HODE          |
| 9-HODE            | 295.2 | 171.1 | 120 | 10 | 4 | 18.0  | d4-9HODE          |
| 15-HETE           | 319.2 | 219.2 | 120 | 4  | 4 | 19.1  | d8-5-HETE         |
| 17(18)-EpETE      | 317.2 | 215.2 | 130 | 4  | 4 | 19.2  | d-11-11(12)EpEtrE |
| 13-oxo-ODE        | 293.2 | 195.1 | 95  | 13 | 4 | 19.3  | d6-20-HETE        |
| 17-HDoHE          | 343.2 | 281.2 | 95  | 4  | 4 | 19.5  | d4-9HODE          |
| 11-HETE           | 319.2 | 167.2 | 100 | 7  | 4 | 19.5  | d8-5-HETE         |
| 9-HETE            | 319.2 | 167.2 | 80  | 7  | 4 | 19.8  | d8-5-HETE         |
| 9-oxo-ODE         | 293.2 | 185.1 | 90  | 13 | 4 | 20.0  | d6-20-HETE        |
| 15-oxo-ETE        | 317.2 | 113.1 | 125 | 10 | 6 | 20.1  | d8-5-HETE         |
| 14(15)-EpETE      | 317.2 | 207.2 | 100 | 4  | 4 | 20.2  | d-11-11(12)EpEtrE |
| 8-HETE            | 319.2 | 155.2 | 120 | 7  | 4 | 20.4  | d8-5-HETE         |
| 11(12)-EpETE      | 317.2 | 167.2 | 90  | 4  | 4 | 20.5  | d-11-11(12)EpEtrE |
| 12-HETE           | 319.2 | 179.2 | 120 | 7  | 4 | 20.5  | d8-5-HETE         |

|                   |       |       |     |    |   |      |                   |
|-------------------|-------|-------|-----|----|---|------|-------------------|
| 8(9)-EpETE        | 317.2 | 127.2 | 115 | 4  | 4 | 20.8 | d-11-11(12)EpEtrE |
| 12-oxo-ETE        | 317.2 | 153.1 | 115 | 7  | 4 | 21.1 | d8-5-HETE         |
| 15(S)-HETrE       | 321.2 | 221.2 | 85  | 7  | 4 | 21.1 | d8-5-HETE         |
| 5-HETE            | 319.2 | 115.1 | 90  | 10 | 4 | 21.2 | d8-5-HETE         |
| d8-5-HETE         | 327.2 | 116.1 | 75  | 7  | 4 | 21.2 | -                 |
| 12(13)EpOME       | 295.3 | 195.2 | 95  | 7  | 4 | 22.5 | d-11-11(12)EpEtrE |
| 19(20)-EpDPE      | 343.2 | 241.2 | 130 | 7  | 4 | 22.5 | d-11-11(12)EpEtrE |
| 14(15)-EpETrE     | 319.2 | 219.3 | 130 | 4  | 4 | 22.8 | d-11-11(12)EpEtrE |
| 9(10)-EpOME       | 295.3 | 171.1 | 100 | 7  | 4 | 22.8 | d-11-11(12)EpEtrE |
| 16(17)-EpDPE      | 343.2 | 233.2 | 130 | 4  | 4 | 23.3 | d-11-11(12)EpEtrE |
| 13(14)-EpDPE      | 343.2 | 193.2 | 80  | 4  | 4 | 23.4 | d-11-11(12)EpEtrE |
| 5-oxo-ETE         | 317.2 | 273.2 | 120 | 7  | 4 | 23.4 | d8-5-HETE         |
| 11(12)-EpETrE     | 319.2 | 167.2 | 105 | 4  | 4 | 23.5 | d-11-11(12)EpEtrE |
| d-11-11(12)EpEtrE | 330.2 | 167.2 | 80  | 7  | 4 | 23.5 | -                 |
| 10(11)-EpDPE      | 343.2 | 153.2 | 90  | 4  | 4 | 23.6 | d-11-11(12)EpEtrE |
| 7(8)-EpDPE        | 343.2 | 113.1 | 85  | 4  | 4 | 23.8 | d-11-11(12)EpEtrE |
| 8(9)-EpETrE       | 319.2 | 167.2 | 90  | 4  | 4 | 23.9 | d-11-11(12)EpEtrE |
| 5(6)-EpETrE       | 319.2 | 191.1 | 115 | 4  | 4 | 24.2 | d-11-11(12)EpEtrE |

Abbr: m/z, mass to charge ratio; CE, collision energy; Rt, Retention Time.

**Table S3.** Concentration of polar metabolites (nmol/mg)\*.

|                       | Method A |                   | Method B |                   | Method C |                   | p-value** |
|-----------------------|----------|-------------------|----------|-------------------|----------|-------------------|-----------|
| 4-Aminobutyrate       | 851      | ± 195             | 795      | ± 86              | 787      | ± 117             | NS        |
| AMP                   | 843      | ± 167             | 1011     | ± 173             | 1060     | ± 69              | NS        |
| Acetate               | 366      | ± 176             | 167      | ± 78              | 133      | ± 61              | NS        |
| Alanine               | 452      | ± 75              | 439      | ± 49              | 462      | ± 56              | NS        |
| Ascorbate             | 545      | ± 98 <sup>a</sup> | 65       | ± 16 <sup>b</sup> | 59       | ± 41 <sup>b</sup> | <0.001    |
| Aspartate             | 1249     | ± 237             | 1251     | ± 178             | 1336     | ± 138             | NS        |
| Betaine               | 58       | ± 10              | 56       | ± 6               | 58       | ± 6               | NS        |
| Choline               | 58       | ± 17              | 42       | ± 5               | 54       | ± 8               | NS        |
| Creatine              | 3991     | ± 745             | 3947     | ± 517             | 4071     | ± 414             | NS        |
| Dimethyl-sulfone      | 8        | ± 3               | 9        | ± 4               | 13       | ± 5               | NS        |
| Ethanolamine          | 133      | ± 40              | 83       | ± 51              | 103      | ± 44              | NS        |
| Formate               | 291      | ± 187             | 381      | ± 123             | 328      | ± 104             | NS        |
| Fumarate              | 30       | ± 6               | 33       | ± 10              | 25       | ± 14              | NS        |
| Glutamate             | 5651     | ± 1071            | 5681     | ± 810             | 6052     | ± 679             | NS        |
| Glutamine             | 6347     | ± 902             | 6396     | ± 918             | 6415     | ± 594             | NS        |
| Glutathione           | 526      | ± 117             | 490      | ± 102             | 573      | ± 109             | NS        |
| Glycerol              | 188      | ± 46              | 192      | ± 27              | 191      | ± 39              | NS        |
| Glycine               | 354      | ± 60              | 359      | ± 38              | 364      | ± 38              | NS        |
| Guanosine             | 41       | ± 14              | 29       | ± 8               | 34       | ± 8               | NS        |
| Hypoxanthine          | 79       | ± 33              | 80       | ± 19              | 92       | ± 22              | NS        |
| IMP                   | 44       | ± 14              | 49       | ± 15              | 41       | ± 18              | NS        |
| Inosine               | 446      | ± 199             | 220      | ± 28              | 225      | ± 67              | NS        |
| Isoleucine            | 85       | ± 19              | 73       | ± 16              | 92       | ± 5               | NS        |
| Lactate               | 10843    | ± 2228            | 11237    | ± 1646            | 11554    | ± 1181            | NS        |
| Leucine               | 81       | ± 22              | 87       | ± 14              | 103      | ± 22              | NS        |
| Lysine                | 223      | ± 64              | 212      | ± 45              | 183      | ± 44              | NS        |
| N-Acetylaspartate     | 5547     | ± 1361            | 5836     | ± 886             | 6154     | ± 616             | NS        |
| N-Acetylglutamate     | 58       | ± 16              | 55       | ± 26              | 47       | ± 14              | NS        |
| NAD+                  | 115      | ± 72              | 179      | ± 58              | 148      | ± 25              | NS        |
| O-Phosphocholine      | 191      | ± 35              | 238      | ± 38              | 194      | ± 21              | NS        |
| O-Phosphoethanolamine | 1580     | ± 349             | 1625     | ± 248             | 1458     | ± 120             | NS        |
| Ornithine             | 55       | ± 17              | 49       | ± 9               | 88       | ± 35              | NS        |
| Propylene-glycol      | 109      | ± 55              | 189      | ± 125             | 174      | ± 99              | NS        |
| Serine                | 330      | ± 98              | 300      | ± 41              | 281      | ± 73              | NS        |
| Succinate             | 302      | ± 58              | 295      | ± 44              | 303      | ± 19              | NS        |
| Taurine               | 443      | ± 135             | 426      | ± 60              | 505      | ± 84              | NS        |
| Threonine             | 723      | ± 163             | 657      | ± 101             | 756      | ± 99              | NS        |
| Tyrosine              | 171      | ± 37              | 153      | ± 36              | 155      | ± 4               | NS        |
| Uridine               | 55       | ± 18              | 49       | ± 10              | 39       | ± 19              | NS        |
| Valine                | 112      | ± 14              | 111      | ± 11              | 124      | ± 14              | NS        |
| myo-Inositol          | 1967     | ± 353             | 1914     | ± 222             | 2072     | ± 212             | NS        |

|                             |     |   |    |     |   |    |     |   |    |    |
|-----------------------------|-----|---|----|-----|---|----|-----|---|----|----|
| sn-Glycero-3-phosphocholine | 318 | ± | 60 | 270 | ± | 70 | 389 | ± | 41 | NS |
| β-Alanine                   | 43  | ± | 13 | 46  | ± | 13 | 38  | ± | 15 | NS |

---

\*Data are mean ± SD of five replicates per extraction method.

\*\*Data were analyzed by one-way ANOVA (p-values were generated after false discovery rate (FDR) correction) followed by Tukey's post-hoc test. Different superscript letters indicate significant differences between groups.

Abbreviations: AMP, adenosine monophosphate; IMP, inosine monophosphate; NAD, nicotinamide adenine dinucleotide; NS, not significant.



**Table S4.** Total yield of oxylipin (pmol/mg)\*.

|               | Method A |   |        | Method B     |        |   | Method C |               |        | P-value** |        |              |         |
|---------------|----------|---|--------|--------------|--------|---|----------|---------------|--------|-----------|--------|--------------|---------|
| 10(11)-EpDPE  | 0.69     | ± | 0.23   | <sup>a</sup> | 0.44   | ± | 0.057    | <sup>b</sup>  | 0.45   | ±         | 0.060  | <sup>b</sup> | 0.050   |
| 11(12)-EpETE  | 0.016    | ± | 0.015  |              | 0.021  | ± | 0.0060   |               | 0.011  | ±         | 0.010  |              | NS      |
| 11(12)-EpETrE | 1.71     | ± | 0.89   | <sup>a</sup> | 0.50   | ± | 0.16     | <sup>b</sup>  | 0.51   | ±         | 0.059  | <sup>b</sup> | 0.012   |
| 12(13)EpOME   | 1.91     | ± | 0.81   | <sup>a</sup> | 0.69   | ± | 0.15     | <sup>b</sup>  | 0.59   | ±         | 0.065  | <sup>b</sup> | 0.0070  |
| 13(14)-EpDPE  | 5.059    | ± | 1.27   | <sup>a</sup> | 4.01   | ± | 0.56     | <sup>ab</sup> | 2.65   | ±         | 0.39   | <sup>b</sup> | 0.0083  |
| 14(15)-EpETrE | 22.73    | ± | 7.80   | <sup>a</sup> | 13.84  | ± | 2.33     | <sup>b</sup>  | 8.09   | ±         | 1.02   | <sup>b</sup> | 0.0070  |
| 16(17)-EpDPE  | 7.072    | ± | 1.82   | <sup>a</sup> | 4.96   | ± | 0.77     | <sup>b</sup>  | 2.99   | ±         | 0.37   | <sup>c</sup> | 0.0052  |
| 19(20)-EpDPE  | 12.14    | ± | 4.64   | <sup>a</sup> | 4.40   | ± | 1.38     | <sup>b</sup>  | 3.12   | ±         | 0.34   | <sup>b</sup> | 0.0052  |
| 5(6)-EpETrE   | 6.60     | ± | 2.063  | <sup>a</sup> | 4.43   | ± | 0.54     | <sup>b</sup>  | 3.38   | ±         | 0.58   | <sup>b</sup> | 0.014   |
| 7(8)-EpDPE    | 3.49     | ± | 0.96   | <sup>a</sup> | 2.13   | ± | 0.35     | <sup>b</sup>  | 1.55   | ±         | 0.18   | <sup>b</sup> | 0.0057  |
| 8(9)-EpETrE   | 3.52     | ± | 1.089  | <sup>a</sup> | 2.41   | ± | 0.35     | <sup>ab</sup> | 1.73   | ±         | 0.28   | <sup>b</sup> | 0.012   |
| 9(10)-EpOME   | 1.19     | ± | 0.35   | <sup>a</sup> | 0.84   | ± | 0.072    | <sup>ab</sup> | 0.56   | ±         | 0.099  | <sup>b</sup> | 0.0083  |
| 12,13-DiHOME  | 0.011    | ± | 0.0050 |              | 0.0060 | ± | 0.0010   |               | 0.0080 | ±         | 0.0010 |              | 0.084   |
| 14,15-DiHETrE | 0.0050   | ± | 0.0040 |              | 0.0070 | ± | 0.0010   |               | 0.0070 | ±         | 0.0010 |              | NS      |
| 5,6-DiHETE    | 0.024    | ± | 0.014  |              | 0.011  | ± | 0.0060   |               | 0.011  | ±         | 0.010  |              | NS      |
| 5,6-DiHETrE   | 0.080    | ± | 0.019  | <sup>a</sup> | 0.028  | ± | 0.0050   | <sup>b</sup>  | 0.020  | ±         | 0.0060 | <sup>b</sup> | 0.00025 |
| 13-HODE       | 2.84     | ± | 0.39   |              | 3.11   | ± | 0.61     |               | 3.46   | ±         | 0.91   |              | NS      |
| 17-HDoHE      | 0.057    | ± | 0.0080 |              | 0.067  | ± | 0.013    |               | 0.060  | ±         | 0.012  |              | NS      |
| 9-HODE        | 0.55     | ± | 0.042  |              | 0.57   | ± | 0.12     |               | 0.60   | ±         | 0.18   |              | NS      |
| 13-oxo-ODE    | 0.030    | ± | 0.0080 |              | 0.032  | ± | 0.0080   |               | 0.037  | ±         | 0.0060 |              | NS      |
| 9-oxo-ODE     | 0.031    | ± | 0.0030 |              | 0.035  | ± | 0.0080   |               | 0.035  | ±         | 0.0070 |              | NS      |
| 11-HETE       | 0.066    | ± | 0.011  |              | 0.055  | ± | 0.0090   |               | 0.050  | ±         | 0.018  |              | NS      |
| 12-HETE       | 0.058    | ± | 0.0090 |              | 0.051  | ± | 0.0080   |               | 0.044  | ±         | 0.014  |              | NS      |
| 15-HEPE       | 0.14     | ± | 0.033  | <sup>a</sup> | 0.12   | ± | 0.016    | <sup>ab</sup> | 0.085  | ±         | 0.021  | <sup>b</sup> | 0.039   |
| 15-HETE       | 0.18     | ± | 0.022  |              | 0.15   | ± | 0.024    |               | 0.14   | ±         | 0.051  |              | NS      |
| 15-oxo-ETE    | 0.017    | ± | 0.0030 |              | 0.013  | ± | 0.0030   |               | 0.015  | ±         | 0.0040 |              | NS      |
| 15(S)-HETrE   | 0.0080   | ± | 0.0030 |              | 0.0070 | ± | 0.0010   |               | 0.0070 | ±         | 0.0020 |              | NS      |
| 5-HETE        | 0.10     | ± | 0.0030 | <sup>a</sup> | 0.079  | ± | 0.013    | <sup>b</sup>  | 0.071  | ±         | 0.018  | <sup>b</sup> | 0.012   |
| 8-HETE        | 0.055    | ± | 0.010  |              | 0.040  | ± | 0.0050   |               | 0.040  | ±         | 0.013  |              | NS      |
| 9-HETE        | 0.046    | ± | 0.0060 |              | 0.037  | ± | 0.0060   |               | 0.036  | ±         | 0.0070 |              | NS      |

\*Data are mean ± SD of five replicates per extraction method.

\*\*Data were analyzed by one-way ANOVA (p-values were generated after FDR correction) followed by Tukey's post-hoc test. Different superscript letters indicate significant differences between groups.

Abbreviations: NS, not significant

**Table S5.** Percent recovery of oxylipin surrogates\*.

|                   | Method A |   |                    | Method B |   |                   | Method C |   |                   | p-value** |
|-------------------|----------|---|--------------------|----------|---|-------------------|----------|---|-------------------|-----------|
| d-11-11(12)EpEtrE | 14.80    | ± | 2.61 <sup>a</sup>  | 22.59    | ± | 3.82 <sup>b</sup> | 26.60    | ± | 5.24 <sup>b</sup> | 0.030     |
| d11-14,15-DiHETrE | 58.89    | ± | 12.89 <sup>a</sup> | 86.74    | ± | 8.49 <sup>b</sup> | 80.17    | ± | 8.76 <sup>b</sup> | 0.030     |
| d4-6-keto-PGF1a   | 63.24    | ± | 8.71               | 68.17    | ± | 5.82              | 62.76    | ± | 6.37              | NS        |
| d4-9HODE          | 75.36    | ± | 12.02              | 90.84    | ± | 12.37             | 79.98    | ± | 8.50              | NS        |
| d4-LTB4           | 50.13    | ± | 9.03               | 50.14    | ± | 8.63              | 57.61    | ± | 7.29              | NS        |
| d4-PGE2           | 0.36     | ± | 0.82               | 0.60     | ± | 0.86              | 0.72     | ± | 0.48              | NS        |
| d4-TXB2           | 55.09    | ± | 8.88               | 61.09    | ± | 6.52              | 56.64    | ± | 6.16              | NS        |
| d6-20-HETE        | 77.21    | ± | 9.82               | 92.33    | ± | 7.97              | 82.11    | ± | 5.21              | NS        |
| d8-5-HETE         | 62.88    | ± | 11.61              | 79.40    | ± | 8.51              | 70.88    | ± | 8.11              | NS        |

\*Data are mean ± SD of five replicates per extraction method.

\*\*Data were analyzed by one-way ANOVA (p-values were generated after FDR correction) followed by Tukey's post-hoc test. Different superscript letters indicate significant differences between groups.

Abbreviations: NS, not significant.

**Table S6.** The concentration of DNA ( $\mu\text{g}/\mu\text{L}$ ), RNA ( $\text{ng}/\mu\text{L}$ ), and small RNA ( $\text{ng}/\mu\text{L}$ ) measured by Qubit.

|          | DNA                                    |        |                       | RNA                                  |        |                                    | Small RNA                            |        |                                    |
|----------|----------------------------------------|--------|-----------------------|--------------------------------------|--------|------------------------------------|--------------------------------------|--------|------------------------------------|
|          | Mean*<br>( $\mu\text{g}/\mu\text{L}$ ) | CV (%) | Total yield**<br>(mg) | Mean*<br>( $\text{ng}/\mu\text{L}$ ) | CV (%) | Total yield**<br>( $\mu\text{g}$ ) | Mean*<br>( $\text{ng}/\mu\text{L}$ ) | CV (%) | Total yield**<br>( $\mu\text{g}$ ) |
| Method A | 12.38 $\pm$ 3.55                       | 28.70  | 1.24 $\pm$ 0.36       | 183.52 $\pm$ 57.77                   | 31.48  | 9.18 $\pm$ 2.89                    | 19.61 $\pm$ 4.01                     | 20.44  | 0.27 $\pm$ 0.056                   |
| Method B | 19.49 $\pm$ 6.97                       | 35.75  | 1.95 $\pm$ 0.70       | 67.53 $\pm$ 50.14                    | 74.25  | 3.38 $\pm$ 2.51                    | 25.59 $\pm$ 18.03                    | 70.27  | 0.36 $\pm$ 0.25                    |
| Method C | 19.48 $\pm$ 6.11                       | 31.36  | 1.95 $\pm$ 0.61       | 117.82 $\pm$ 76.82                   | 65.20  | 5.89 $\pm$ 3.84                    | 34.38 $\pm$ 8.87                     | 25.79  | 0.48 $\pm$ 0.12                    |

\* Calculated as the mean  $\pm$  SD of five technical replicates for each method, except for Method B that only had four for RNA assessments due to a technical error.

\*\*Total yield was calculated based on the concentrations and the volume of eluates.

**Table S7.** Summary of quality assessments for DNA and RNA.

|          | DNA*                     |                   | RNA**                    |                   |                      |               |
|----------|--------------------------|-------------------|--------------------------|-------------------|----------------------|---------------|
|          | 260/280<br>Mean $\pm$ SD | 260/280<br>CV (%) | 260/280<br>Mean $\pm$ SD | 260/280<br>CV (%) | RIN<br>Mean $\pm$ SD | RIN<br>CV (%) |
| Method A | 2.03 $\pm$ 0.040         | 1.89              | 2.09 $\pm$ 0.010         | 0.40              | 7.34 $\pm$ 0.23      | 3.14          |
| Method B | 1.96 $\pm$ 0.050         | 2.31              | 2.14 $\pm$ 0.10          | 4.57              | 7.53 $\pm$ 0.46      | 6.17          |
| Method C | 1.94 $\pm$ 0.030         | 1.65              | 2.08 $\pm$ 0.020         | 1.00              | 7.02 $\pm$ 0.58      | 8.21          |

\*DNA quality was assessed by NanoDrop (260/280 measurements) of the 5 technical replicates for each method.

\*\*RNA quality was assessed by both NanoDrop and Bioanalyzer (RIN) of the 5 technical replicates for each method, except for Method B that only had four due to a technical error.

**Table S8.** The yield of protein (g/mg) and the total yield (mg) of brain tissue after analysis by the DC Protein Assay kit.

|              | <b>Concentration<br/>Mean*<br/>(mg/mL)</b> | <b>Concentration<br/>CV (%)</b> | <b>Total yield**<br/>(mg)</b> |
|--------------|--------------------------------------------|---------------------------------|-------------------------------|
| Method A     | 18.48 ± 4.96                               | 26.86                           | 1.85 ± 0.50                   |
| Method B     | 18.52 ± 1.75                               | 9.46                            | 1.85 ± 0.18                   |
| Method C     | 23.52 ± 3.04                               | 12.94                           | 2.35 ± 0.30                   |
| Conventional | 12.67 ± 0.84                               | 6.59                            | 12.67 ± 0.84                  |

\*Expressed as mean ± SD for five technical replicates for each extraction method.

\*\*30 mg of ground tissue was used for multi-extraction methods (Method A, B, and C), whereas 50 mg was extracted using the conventional method.

**Table S9.** A list of abbreviations of oxylipin species and their internal standards.

| <b>Abbreviation</b> | <b>Compound name</b>                     |
|---------------------|------------------------------------------|
| d11-11(12)-EpETrE   | d-11-11(12)-epoxyeicosatrienoic acid     |
| d11-14,15-DiHETrE   | d11-14,15-dihydroxyeicosatrienoic acid   |
| d4-6-keto-PGF1a     | d4-6-keto-prostaglandin F1 alpha         |
| d4-9-HODE           | d4-9-hydroxyoctadecadienoic acid         |
| d4-LTB4             | d4-Leukotriene B4                        |
| d4-PGE2             | d4-Prostaglandin E2                      |
| d4-TXB2             | d4-Tromboxane B2                         |
| d6-20-HETE          | d6- 20-hydroxyeicosatetraenoic acid      |
| d8-5-HETE           | d8- 5-hydroxyeicosatetraenoic acid       |
| 12(13)-EpOME        | 12(13)-epoxyoctadecamonoenoic acid       |
| 13-HODE             | 13-hydroxyoctadecadienoic acid           |
| 13-oxo-ODE          | 13-oxo-octadecadienoic acid              |
| 9-HODE              | 9-hydroxyoctadecadienoic acid            |
| 9-oxo-ODE           | 9-oxo-octadecadienoic acid               |
| 9,10,13-TriHOME     | 9,10,13-trihydroxyoctadecamonoenoic acid |
| 9,12,13-TriHOME     | 9,12,13-trihydroxyoctadecamonoenoic acid |
| 9(10)-EpOME         | 9(10)-epoxyoctadecamonoenoic acid        |
| 20-HETE             | 20-hydroxyeicosatetraenoic acid          |
| 11-HETE             | 11-hydroxyeicosatetraenoic acid          |
| 11,12-DiHETrE       | 11,12-dihydroxyeicosatrienoic acid       |
| 11(12)-EpETrE       | 11(12)-epoxyeicosatrienoic acid          |
| 12-HETE             | 12-hydroxyeicosatetraenoic acid          |
| 12-oxo-ETE          | 12-oxo-eicosatetraenoic acid             |
| 14,15-DiHETrE       | 14,15-dihydroxyeicosatrienoic acid       |
| 14(15)-EpETE        | 14(15)-epoxyeicosatrienoic acid          |
| 14(15)-EpETrE       | 14(15)-epoxyeicosatrienoic acid          |
| 15-deoxy-PGJ2       | 15-deoxy-Prostaglandin J2                |
| 15-HETE             | 15-hydroxyeicosatetraenoic acid          |
| 15-oxo-ETE          | 15-oxo-eicosatetraenoic acid             |
| 20-COOH-LTB4        | 20-COOH- Leukotriene B4                  |
| 20-OH-LTB4          | 20-OH-Leukotriene B4                     |
| 5-HETE              | 5-hydroxyeicosatetraenoic acid           |
| 5-oxo-ETE           | 5-oxo-eicosatetraenoic acid              |
| 5,6-DiHETrE         | 5,6-dihydroxyeicosatrienoic acid         |
| 5(6)-EpETrE         | 5(6)-epoxyeicosatrienoic acid            |
| 6-keto-PGF1a        | 6-keto-prostaglandin F1 alpha            |
| 6-trans-LTB4        | 6-trans-leukotriene B4                   |
| 8-HETE              | 8-hydroxyeicosatetraenoic acid           |
| 8,9-DiHETrE         | 8,9-dihydroxyeicosatrienoic acid         |
| 8(9)-EpETrE         | 8(9)-epoxyeicosatrienoic acid            |
| 9-HETE              | 9-hydroxyeicosatetraenoic acid           |

---

|              |                                       |
|--------------|---------------------------------------|
| LTB4         | Leukotriene B4                        |
| LTC4         | Leukotriene C4                        |
| LTD4         | Leukotriene D4                        |
| LTE4         | Leukotriene E4                        |
| LXA4         | Lipoxin A4                            |
| PGB2         | Prostaglandin B2                      |
| PGD2         | Prostaglandin D2                      |
| PGE2         | Prostaglandin E2                      |
| PGF2a        | Prostaglandin F2 alpha                |
| PGJ2         | Prostaglandin J2                      |
| TXB2         | Tromboxane B2                         |
| 12,13-DiHOME | 12,13-dihydroxyoctadecamonoenoic acid |
| 13-HOTrE     | 13- hydroxyoctadecatrienoic acid      |
| 9-HOTrE      | 9- hydroxyoctadecatrienoic acid       |
| 9,10-DiHOME  | 9,10-dihydroxyoctadecamonoenoic acid  |
| PGD1         | Prostaglandin D1                      |
| PGE1         | Prostaglandin E1                      |
| 10(11)-EpDPE | 10(11)-epoxydocosapentaenoic acid     |
| 13(14)-EpDPE | 13(14)-epoxydocosapentaenoic acid     |
| 16(17)-EpDPE | 16(17)-epoxydocosapentaenoic acid     |
| 17-HDoHE     | 17- hydroxydocosahexaenoic acid       |
| 19(20)-EpDPE | 19(20)-epoxydocosapentaenoic acid     |
| 7(8)-EpDPE   | 7(8)-epoxydocosapentaenoic acid       |
| 11(12)-EpETE | 11(12)-epoxyeicosateteaenoic acid     |
| 12-HEPE      | 12-hydroxyeicosapentaenoic acid       |
| 14,15-DiHETE | 14,15-dihydroxyeicosatetraenoic acid  |
| 15-HEPE      | 15-hydroxyeicosapentaenoic acid       |
| 17,18-DiHETE | 17,18-dihydroxyeicosatetraenoic acid  |
| 17(18)-EpETE | 17(18)-epoxyeicosateteaenoic acid     |
| 5-HEPE       | 5-hydroxyeicosapentaenoic acid        |
| 5,15-DiHETE  | 5,15-dihydroxyeicosatetraenoic acid   |
| 5,6-DiHETE   | 5,6-dihydroxyeicosatetraenoic acid    |
| 8-HEPE       | 8-hydroxyeicosapentaenoic acid        |
| 8,15-DiHETE  | 8,15-dihydroxyeicosatetraenoic acid   |
| 8(9)-EpETE   | 8(9)-epoxyeicosateteaenoic acid       |
| PGD3         | Prostaglandin D3                      |
| PGE3         | Prostaglandin E3                      |
| Resolvin E1  | Resolvin E1                           |
| LTB3         | Leukotriene B3                        |
| 15(S)-HETrE  | 15(S)-hydroxyeicosatrienoic acid      |

---

## Supplementary Figures

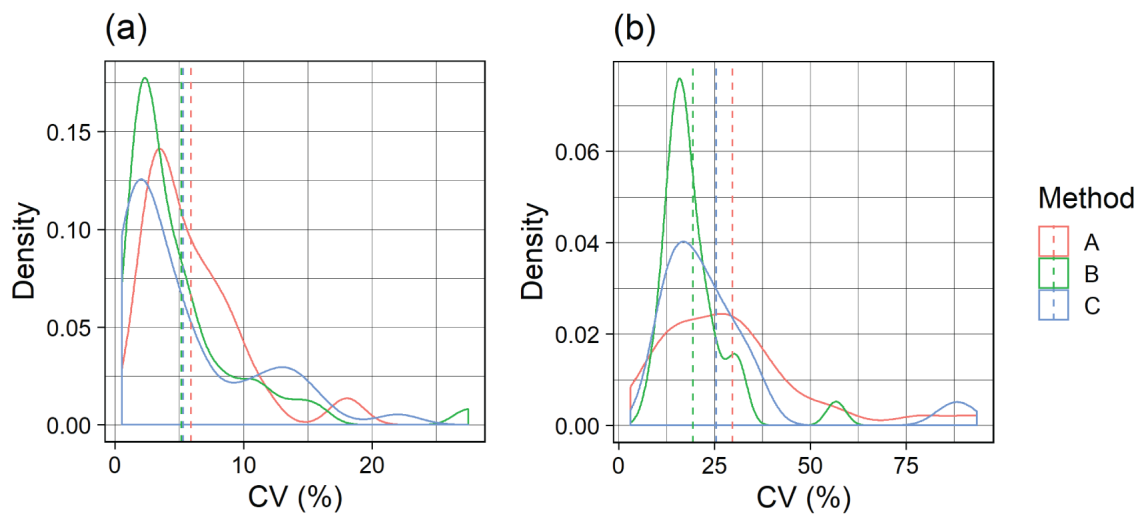

**Figure S1.** Density plots of the coefficient of variation (CV) calculated for (a) polar metabolites and (b) non-polar metabolites. CVs of the five technical replicates of each method were calculated for each metabolite, and used to generate the plot. Mean of all CVs within each group are denoted by the dotted lines. Method A (red), Method B (green), and Method C (blue).



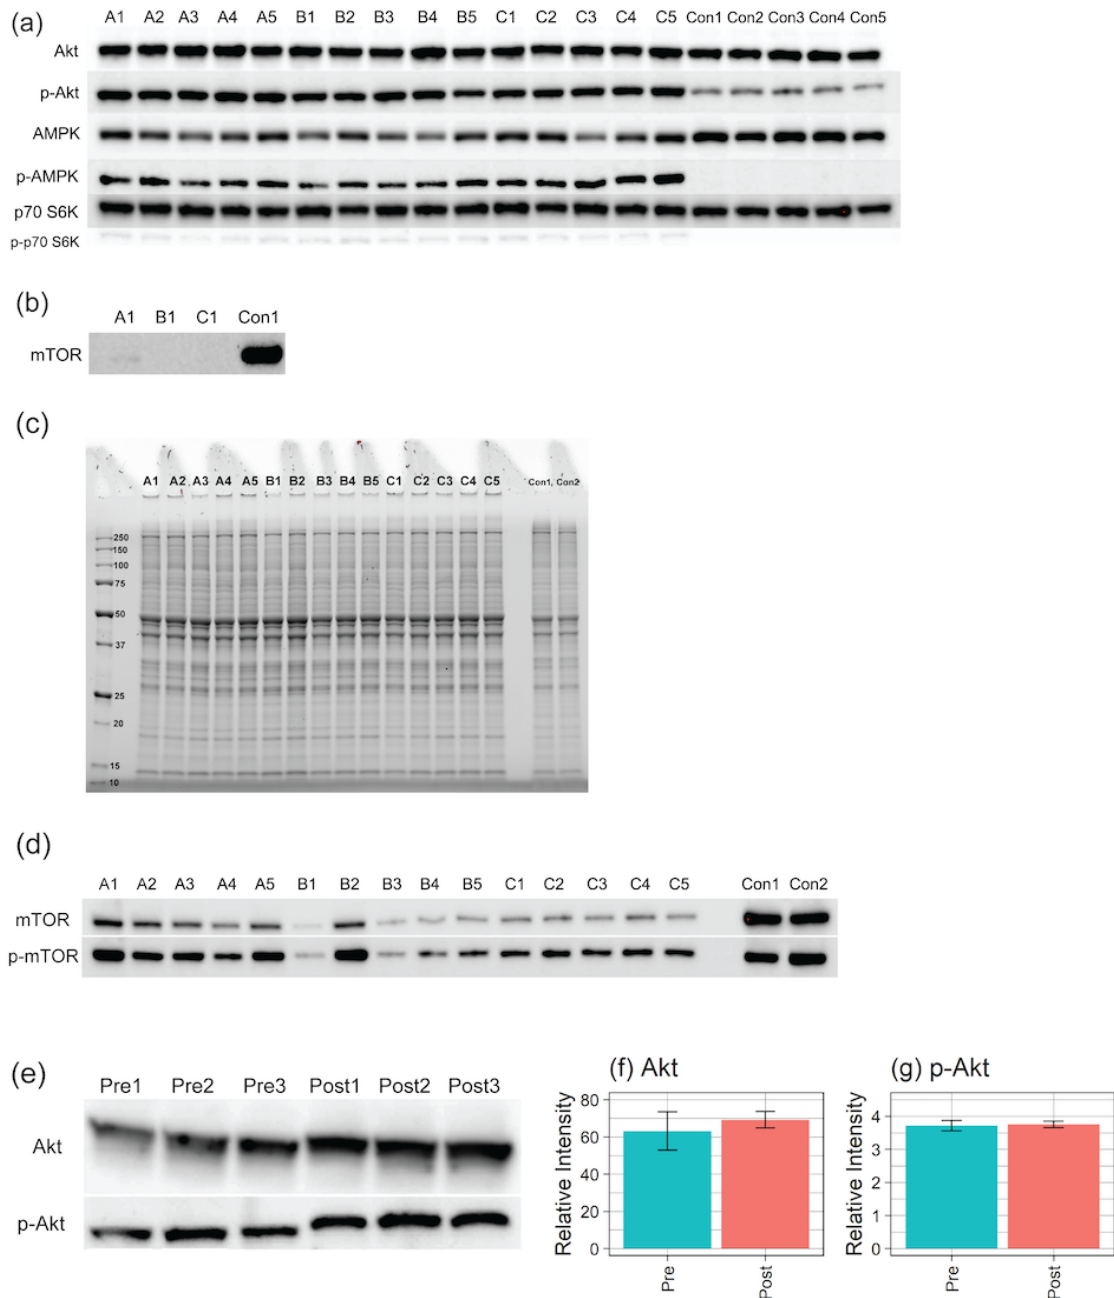

**Figure S2.** Comparison of protein recovery by Western blot before and after desalting. Chemiluminescent blots of (a) all proteins of interest except for mTOR before desalting and (b) mTOR before desalting treatment; (c) SDS-PAGE image after desalting; Chemiluminescent blots of (d) total and phospho-mTOR after desalting and (e) Akt and p-Akt pre- and post-desalting. Bar plots of the relative intensity of (f) Akt and (g) p-Akt before and after desalting. Protein samples extracted by the conventional method were not desalted. Abbr: A1 - A5, replicates of Method A; B1 - B5, replicates of Method B; C1 - C5, replicates of Method C; Con1 - Con2, replicates of the conventional method; Pre1-Pre3, replicates of protein samples extracted by Method C and before applying desalting; Post1-Post3, replicates of protein extracted by Method C after desalting.
